# Supplementary material for: Daily Consumption of Coffee and Eating Bread at Breakfast Time Is Associated with Lower Visceral Adipose Tissue and with Lower Prevalence of Both Visceral Obesity and Metabolic Syndrome in Japanese Populations: A Cross-Sectional Study
Source: PubMed Central journal article supplement (PMC7599629; doi:10.3390/nu12103090), 2020-10-11
Supplement: nutrients-12-03090-s001.pdf [file nutrients-12-03090-s001.pdf]

Supplemental Table 1. Comparison of the association of consumption of bread at breakfast with visceral obesity and metabolic syndrome

|                                   | Coffee less than 1<br>time/day |             | Green tea less than 1<br>time/day |             | Coffee more than 1<br>time/day |             | Green tea more than 1<br>time/day |             |
|-----------------------------------|--------------------------------|-------------|-----------------------------------|-------------|--------------------------------|-------------|-----------------------------------|-------------|
|                                   | OR                             | 95% CI      | OR                                | 95% CI      | OR                             | 95% CI      | OR                                | 95% CI      |
| Obesity (BMI $\geq$ 25)           | 0.655                          | 0.443-0.969 | 0.640                             | 0.489-0.838 | 0.588                          | 0.469-0.736 | 0.567                             | 0.429-0.748 |
| Visceral obesity (VAT $\geq$ 100) | 1.130                          | 0.718-1.778 | 0.602                             | 0.428-0.846 | 0.549                          | 0.413-0.730 | 0.700                             | 0.500-0.979 |
| Metabolic syndrome                | 0.770                          | 0.500-1.187 | 0.621                             | 0.454-0.849 | 0.614                          | 0.472-0.798 | 0.621                             | 0.453-0.850 |

Adjusted for age, sex, daily alcohol drinking, brinkman index, sleeping time, METs, drug treatment for hypertension, dyslipidemia and diabetes
